# Supplementary material for: Patterns of smallpox mortality in London, England, over three centuries
Source: PubMed Central journal article supplement (PMC7751884; doi:10.1371/journal.pbio.3000506), 2020-12-21
Supplement: pbio.3000506.s002.pdf [file pbio.3000506.s002.pdf]

Responses to Reviewers of PLoS Biology ms  
PBIولوجY-D-19-02569R1  
“Patterns of smallpox mortality in London, England,  
over three centuries”

Olga Krylova and David Earn

July 2, 2020

1 Dear Roli,

2 Thank you for the reviews you sent to us more than six months ago. We greatly appreciate  
3 your patience in giving us such a long time to revise our manuscript given that we are both  
4 overwhelmed with work related to advising governments about COVID-19.

5 We have worked very hard to make major revisions to the manuscript, following the many  
6 excellent suggestions and comments of the four reviewers. For convenience, we include below  
7 the text of your decision letter and all the reviews. Our responses are in [blue](#).

8 Sincerely,  
9 David Earn and Olga Krylova

10

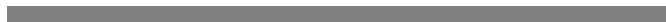

11 **EDITOR’S DECISION LETTER:**

12 Subject: Your PLOS Biology Submission (PBIولوجY-D-19-02569R1) - [EMID:5e8e28b0901430bf]

13 Dear David,

14 Thank you very much for submitting your manuscript “Patterns of smallpox mortality in  
15 London, England, over three centuries” for consideration as a Short Report at PLOS Biology.

16 Your manuscript has been evaluated by the PLOS Biology editors, an Academic Editor with  
17 relevant expertise, and by four independent reviewers.

18 You'll see that all four reviewers are broadly positive about the study. However, reviewer  
19 #2 (a historical demographer) raises some substantial concerns about the historical aspects,  
20 including record-keeping practices over the years; please note that her main review is in the  
21 Word attachment. In addition, reviewers #3 and #4 ask for you to expand further on your  
22 analyses. Please can you attend to all the concerns raised.

23 In addition, I think I might've been a bit hasty in asking you to compress the Figures to  
24 fit our "Short Report" format. Given the overall enthusiasm expressed by reviewers #1, #3  
25 and #4, the Academic Editor and I would be happy for you to re-expand the Figures and  
26 text (as needed) and change back to a full Research Article, should you wish.

27 Thank you. We have taken you up on this and are submitting as a Research Article.

28 In light of the reviews (below), we will not be able to accept the current version of the  
29 manuscript, but we would welcome resubmission of a much-revised version that takes into  
30 account the reviewers' comments. We cannot make any decision about publication until  
31 we have seen the revised manuscript and your response to the reviewers' comments. Your  
32 revised manuscript is also likely to be sent for further evaluation by the reviewers.

33 Your revisions should address the specific points made by each reviewer. Please submit a  
34 file detailing your responses to the editorial requests and a point-by-point response to all of  
35 the reviewers' comments that indicates the changes you have made to the manuscript. In  
36 addition to a clean copy of the manuscript, please upload a 'track-changes' version of your  
37 manuscript that specifies the edits made. This should be uploaded as a "Related" file type.  
38 You should also cite any additional relevant literature that has been published since the  
39 original submission and mention any additional citations in your response.

40 We do not use Word, so cannot create the "Track Changes" document that you have re-  
41 quested. We could produce a `latex-diff` document, but the changes are so substantial  
42 that it is difficult to see how such a document would be useful to the referees. If you would  
43 nevertheless like such a document, please let us know.

44 Please note while forming your response, if your article is accepted, you may have the  
45 opportunity to make the peer review history publicly available. The record will include  
46 editor decision letters (with reviews) and your responses to reviewer comments. If eligible,  
47 we will contact you to opt in or out.

48 Before you revise your manuscript, please review the following PLOS policy and formatting  
49 requirements checklist PDF: [http://journals.plos.org/plosbiology/s/file?id=9411/  
50 plos-biology-formatting-checklist.pdf](http://journals.plos.org/plosbiology/s/file?id=9411/plos-biology-formatting-checklist.pdf). It is helpful if you format your revision ac-  
51 cording to our requirements - should your paper subsequently be accepted, this will save  
52 time at the acceptance stage.

53 Please note that as a condition of publication PLOS' data policy ([http://journals.plos.](http://journals.plos)

54 [org/plosbiology/s/data-availability](http://plosbiology/s/data-availability)) requires that you make available all data used  
55 to draw the conclusions arrived at in your manuscript. If you have not already done so, you  
56 must include any data used in your manuscript either in appropriate repositories, within  
57 the body of the manuscript, or as supporting information (N.B. this includes any numerical  
58 values that were used to generate graphs, histograms etc.). For an example see here: [http://](http://www.plosbiology.org/article/info%3Adoi%2F10.1371%2Fjournal.pbio.1001908#s5)  
59 [www.plosbiology.org/article/info%3Adoi%2F10.1371%2Fjournal.pbio.1001908#s5](http://www.plosbiology.org/article/info%3Adoi%2F10.1371%2Fjournal.pbio.1001908#s5).

60 For manuscripts submitted on or after 1st July 2019, we require the original, uncropped  
61 and minimally adjusted images supporting all blot and gel results reported in an article's  
62 figures or Supporting Information files. We will require these files before a manuscript can  
63 be accepted so please prepare them now, if you have not already uploaded them. Please  
64 carefully read our guidelines for how to prepare and upload this data: [https://journals.](https://journals.plos.org/plosbiology/s/figures#loc-blot-and-gel-reporting-requirements)  
65 [plos.org/plosbiology/s/figures#loc-blot-and-gel-reporting-requirements](https://journals.plos.org/plosbiology/s/figures#loc-blot-and-gel-reporting-requirements).

66 Upon resubmission, the editors will assess your revision and if the editors and Academic  
67 Editor feel that the revised manuscript remains appropriate for the journal, we will send the  
68 manuscript for re-review. We aim to consult the same Academic Editor and reviewers for  
69 revised manuscripts but may consult others if needed.

70 We expect to receive your revised manuscript within two months. Please email us ([plosbiol-](mailto:plosbiology@plos.org)  
71 [ogy@plos.org](mailto:plosbiology@plos.org)) to discuss this if you have any questions or concerns, or would like to request  
72 an extension. At this stage, your manuscript remains formally under active consideration at  
73 our journal; please notify us by email if you do not wish to submit a revision and instead  
74 wish to pursue publication elsewhere, so that we may end consideration of the manuscript  
75 at PLOS Biology.

76 When you are ready to submit a revised version of your manuscript, please go to [https:](https://www.editorialmanager.com/pbiology/)  
77 [//www.editorialmanager.com/pbiology/](https://www.editorialmanager.com/pbiology/) and log in as an Author. Click the link labelled  
78 'Submissions Needing Revision' where you will find your submission record.

79 Thank you again for your submission to our journal. We hope that our editorial process has  
80 been constructive thus far, and we welcome your feedback at any time. Please don't hesitate  
81 to contact us if you have any questions or comments.

82 Sincerely,

83 Roli

84 Roland G Roberts, PhD, Senior Editor PLOS Biology

85

---

## 86 REVIEWERS' COMMENTS:

### 87 Reviewer #1:

88 [identifies himself as David N. Fisman]

89 This is a magnificent paper, and highly informative. It is mathematically sophisticated but  
90 clearly written and easily understood by non-mathematicians.

91 Thank you for these kind remarks!

92 I have 2 minor comments:

93 1. Unless I'm mistaken, "prodrom" is not a variant spelling of "prodrome". At any rate,  
94 prodrome (with e) is the more familiar term.

95 Thanks. We have removed the section on the natural history of smallpox, following sugges-  
96 tions of other reviewers, so that term no longer appears in the text.

97 2. Eczema vaccinatum isn't "severe eczema". It represents extensive cutaneous infection  
98 in individuals with pre-existing eczema or atopic dermatitis. This can happen with other  
99 viruses too (c.f., eczema herpeticum). Would revise terminology.

100 Thanks. We have changed "severe eczema" to "serious rash" as on the CDC website (which  
101 we now cite).

### 102 Reviewer #2:

103 [identifies herself as Romola Davenport]

104 IMPORTANT: More detailed comments from this reviewer are available in the attached,  
105 downloadable Word document.

106 This paper reports for the first time an analysis of high frequency counts of smallpox burials  
107 and deaths in London over almost 300 years. The authors juxtapose their analyses with  
108 historical factors, especially relating to the smallpox control measures, that they claim ac-  
109 count for the major changes they identify in smallpox mortality matters in London. The  
110 patterns presented are very interesting however the paper's conclusions are not justified by  
111 the method used. The method adopted relies on visual comparison of smallpox patterns  
112 with an historical timeline. This is unsatisfactory, but would suffice for an exploratory paper  
113 that was designed to point the way to further research. However at present the method is  
114 used with insufficient rigour with respect to data quality and historical accuracy.

115 I recommend that the authors make further adjustments to the smallpox burial data to  
116 correct for known shortcomings, and rewrite sections of the paper to enhance clarity and

117 to acknowledge more fully the tenuous nature of some of the claims regarding the effects of  
118 smallpox control measures. These recommendations are set out more fully in an attached  
119 document.

120 Thank you for these general comments, and all your more detailed comments to which we  
121 reply point-by-point below. We are now very careful not to appear to be claiming to identify  
122 any causal connections between control measures and smallpox dynamics, and have made  
123 the suggested data adjustments.

124 This is an interesting paper and I enjoyed reading it. It presents an analysis of weekly counts  
125 of burials in London over the period 1664 – 1930 to argue that sequential changes in smallpox  
126 control behaviours produced changes in the size and frequency of smallpox epidemics. This  
127 conclusion is in contrast to previous analyses of annual burial patterns, where researchers  
128 argued that changes in epidemic frequency were a function of changing population size,  
129 before the advent of vaccination.

130 Although the authors use wavelet analysis, their approach is largely illustrative and depends  
131 on the juxtaposition of smallpox data with historical events. This is an unsatisfactory  
132 approach, but may be sufficient for an initial exploratory analysis (such as a Short Report).  
133 However there are two grounds for thinking that the visual patterns and similarities adduced  
134 by the authors are unreliable: (1) insufficient attention to the quality of the underlying data,  
135 and (2) the rather cavalier treatment of historical evidence. These two issues need to be  
136 addressed before publication, and are outlined below.

137 (1) In a number of cases the authors attribute changes in the patterns of smallpox burials  
138 to historical events, when these changes could be more easily explained by changes in the  
139 recording of smallpox burials. The London bills of mortality have a number of shortcomings  
140 that must be adjusted for before analysis. The most pertinent of these is the progressive  
141 tendency from c.1780 for parishes to report the annual total of burials in the last week of  
142 the reporting year. The authors note this tendency, but only adjust the burial series for this  
143 defect from 1796, the date at which they consider the influence of vaccination to have begun.  
144 That is, they use their own pre-defined views of the periodization of smallpox patterns to  
145 adjust the underlying data.

146 Our “Data” section is now much improved and discusses all the issues mentioned above, and  
147 others. We have now carefully adjusted for heaping beginning in 1760.

148 The authors adjusted smallpox burials for heaping in December for the period 1796-1842 (or  
149 1841?), by replacing the excess of burials in the first week of December with the average of  
150 adjacent weeks, and then distributing the excess burials evenly over the remaining weeks of  
151 the reporting year (page 7). There are two problems with this method. First, burials tended  
152 to heap on the last week of the reporting year, however this was not always the first week  
153 of December. The last reporting week can be identified from the numbering of weeks in the  
154 original returns, and so this number (either 51, 52, or 53) can be used to identify the last  
155 week of reporting in each year and to adjust the burials. The authors probably did this but  
156 have not made it clear in the text.

157 As now described in the “Heaping” subsection of our “Data” section, we supplemented  
158 automatic detection of heaping with carefully examining every year and making sure no  
159 heaping weeks were missed.

160 The second problem is that the method used to redistribute heaped smallpox burials assumed  
161 that these burials were spread evenly throughout the reporting year. This is unlikely. The  
162 smallpox burials that were reported in weekly totals showed seasonal patterns. This is  
163 because while some parishes became lax in reporting and only reported once a year, others  
164 parishes continued to report weekly, and so the remaining variation in weekly totals probably  
165 reflected the underlying seasonality of smallpox burials in London. It would therefore make  
166 more sense to redistribute the heaped smallpox burials according to the proportional weekly  
167 distributions of unheaped smallpox burials in each year.

168 We agree completely and now redistribute heaped burials according to the proportional  
169 weekly distribution of the unheaped burials as you suggest.

170 The authors’ method for redistributing heaped burials in the bills of mortality between 1796  
171 and 1842 (or 1841? See below) may explain the noisiness of the epidemic cycles in the period  
172 before 1843, compared with afterwards (Figure 2), when the data source switches from the  
173 London bills to the Registrar-General’s weekly returns. The authors attribute the noisiness  
174 in the data between 1796 and 1840 to the co-existence of variolation and vaccination, before  
175 the banning of variolation in 1840. However the noisiness appears to disappear after 1842,  
176 suggesting that it is primarily associated with the switch to a much more dependable source  
177 of weekly data (Figure 3, middle panel). It may be very difficult to discern any effect of the  
178 banning of variolation given its coincidence with a major shift in the quality of the underlying  
179 data.

180 Redistributing the heaped burials more appropriately does not affect the degree of noise  
181 in the data, and we have not detected any visually apparent differences. In our current  
182 “Results” section, the subsection “Patterns in the normalized time series” now contains the  
183 following paragraph:

184 “The years from 1770 to 1810 were characterized by stricter regularity of epi-  
185 demics. This period coincided with more common variolation (the practice gained  
186 popularity after the Suttonian innovation of 1768). Beginning around 1810, the  
187 data show a dramatic reduction in the amplitude of epidemics, though outbreaks  
188 were more frequent and the data are noisier. The apparently declining trend  
189 in epidemic severity is temporally associated with the introduction vaccination;  
190 however, a causal link would be difficult to establish since this is precisely the  
191 period over which the parish registration system collapsed.”

192 (2) The authors have chosen rather arbitrary dates to define historical influences, and this  
193 undermines their argument for congruence between historical and epidemiological processes.  
194 The Industrial Revolution did not start in 1780, and was not associated with a sudden flood  
195 of migrants into London. Other work cited by the authors suggests that adult victims formed  
196 a smaller proportion of smallpox victims in London after c.1770. Moreover the argument that

197 a flood of new susceptibles into London was associated with ‘increasingly severe’ epidemics  
198 (p.11 line 283) is inconsistent with the evidence of a reduction in the (normalised) impact of  
199 smallpox in the last quarter of the eighteenth century (Figure 2, last panel and page 15, line  
200 431). The impression of increasingly large individual epidemics may have been caused by  
201 the uncorrected heaping of burials on single weeks in December before 1796 (which would  
202 produce very large spikes of burials in individual weeks). I would recommend that the  
203 reference to the Industrial Revolution be removed, or complemented with a fuller discussion  
204 of the effects of changing population size and composition on smallpox patterns.

205 We now annotate the Industrial Revolution as occurring during 1760–1830 as indicated in  
206 [Encyclopedia Britannica](#): “the first Industrial Revolution lasted from the mid-18th century  
207 to about 1830.”

208 Our discussion of relevant historical events and previous work on smallpox dynamics in  
209 London has been heavily revised. We are careful not to seem to be making causal claims,  
210 and we are much more explicit about the hypotheses and inferences that have been drawn  
211 previously about a reduction in the mean age at infection around 1770.

212 Similarly, the effects of vaccination could not have started to manifest in 1796, two years  
213 before Jenner published his results. This may seem petty, however the use of dates that are  
214 clearly wrong suggests to more historically-minded readers that the authors are not really  
215 interested in the influence of historical events and processes, which is unfortunate.

216 Indeed the authors also give the impression at times that they are imposing their version  
217 of events on the data. For example, in discussing variolation on page 8 they state that  
218 ‘The impact of smallpox did not change until preventative measures were introduced at the  
219 beginning of the 18th century’ (lines 237-239). However later in discussing their wavelet  
220 analyses they note that ‘From 1664 until 1700 the dominant period was 3-4 years. Around  
221 1705 it shifted to 2-3 years’ (page 15, lines 447-448). The latter description is consistent with  
222 the claims of Duncan et al. that population size and growth influenced epidemic patterns,  
223 and points to other influences in addition to or more important than variolation practices.

224 We hope the reviewer will find our revised text, which includes extended discussion of many  
225 issues, to be suitable and useful. Again, we have been careful not to claim any causal links,  
226 but to highlight issues we believe deserve further attention. We have included an additional  
227 graph comparing the inter-epidemic intervals estimated by Duncan *et al* and Cliff *et al* with  
228 the spectral peaks we obtained from our wavelet analysis.

229 Minor issues:

230 The introductory section provides a rather lengthy and conventional overview of the natural  
231 history and global history of smallpox. This could be shortened considerably, and made much  
232 more interesting and topical by reference to recent discoveries with respect to the molecular  
233 phylogeny of smallpox (e.g. Duggan et al., *\*Current Biology\**, 2016). A key question is  
234 whether changes in smallpox control practices exerted evolutionary pressures that led to  
235 changes in the properties of circulating strains or to the diversification of smallpox lineages.  
236 I would remove the section on ‘Types of smallpox’ (pp. 4-5) or provide an updated discussion



237 that also referred to alastrim.

238 Thank you for these sensible suggestions. We have greatly reduced the length of the introduc-  
239 tion, and sharpened the focus of our review of background (including removing discussion of  
240 types and natural history of smallpox). In addition, we now make reference to the Duggan et  
241 al study (done at McMaster!) in the “Interpretation” subsection of our current “Discussion”.

242 The authors tend to elide London and England in their discussions of data, e.g. pages 6  
243 and 7. The Bills of Mortality refer only to London, not England, and were compiled from  
244 Anglican registers kept, by law, in individual London parishes. The Registrar-General’s  
245 office was not created to remedy the problems of the London bills of mortality (p.7) but to  
246 provide a comprehensive system of registration of births and deaths (instead of baptisms and  
247 burials) for the country as a whole, and one that included non-Anglicans who were otherwise  
248 excluded from the existing requirement for registration of baptism and burials.

249 We heavily revised the “Data” section and we hope there are no remaining traces of elision  
250 of London and England (there are still places where we refer to England rather than London  
251 specifically, because we are describing things not specific to London). We now state that the  
252 RGO was created to “provide a comprehensive and accurate national registration system of  
253 births, marriages and deaths, including causes of death”.

254 A more minor problem is that the London bills of mortality covered a smaller area than the  
255 administrative area of the Registrar-General’s weekly reports. This is not mentioned directly  
256 in the paper, although it was one of the reasons for normalisation. Instead the discrepancies  
257 between the weekly bills and the weekly returns are attributed solely to reduced accuracy of  
258 the bills (Figure 2). However while the bills probably tended to under-report burials within  
259 the reporting area, due to laxity of registration and the progress of non-Anglican sects,  
260 they also represented a progressively shrinking fraction of the metropolitan population, as  
261 a consequence of the expansion of London suburbs outside the area of the bills. Therefore  
262 the extrapolation of births in the middle panel of Figure 2 over-states the deficiencies of the  
263 bills. As the area included within the bills became built-up, the population, and therefore  
264 the numbers of baptisms and burials, would be expected to stabilise, as the figure indicates.  
265 Some brief explanation of the shift in administrative area between the bills and the returns  
266 would help to resolve this.

267 We now directly address the shortcomings of the bills, and the different geographical coverage  
268 of the RG returns. We no longer extrapolate births.

269 p.3 lines 50, 53. Replace ‘injection’ with ‘deliberate infection’ with reference to variolation  
270 and inoculation.

271 Done.

272 p.6 line 157. Replace ‘release of toxins in the blood’ with ‘release of toxins into the blood’.

273 This section has been removed.

274 p.6 line 168. Replace ‘Registration of deaths’ with ‘Registration of burials’.



275 Done.

276 p.7 line 200. Why were the Registrar-General's weekly returns used from 1842, rather than  
277 1840, when they became available?

278 When DE's research assistants were in London photographing the original documents, they  
279 obtained the LBoM up to 1845 and the RGWR starting in 1842 rather than 1840. This was  
280 unfortunate, but should not affect any conclusions of this paper

281 p.7 line 202. Should the phrase '1796-1842' be '1796-1841'? Were the weekly returns used  
282 from 1842?

283 This part of the text has been revised. As we now clarify, the weekly returns were used from  
284 January 1842 onwards.

285 p.12 line 332. 'of 1871' not italicised.

286 Done.

287 p.15 lines 429-30. The normalised measure of smallpox is not a mortality rate, and does  
288 not necessarily indicate the trend in \*per capita\* smallpox mortality. It is a measure of the  
289 relative contribution of smallpox to deaths from all causes. Changes in the total death rate  
290 would produce changes in the normalised smallpox measure, without any necessary changes  
291 in the smallpox death rate (deaths from smallpox per 1,000 population).

292 We are now careful to refer to the proportion of all-cause mortality.

### 293 **Reviewer #3:**

294 This article reports the first analyses of a deeply fascinating dataset: the records of smallpox  
295 mortality in London from 1664-1930. Digitizing and making publicly available this dataset  
296 is a tremendous advance in and of itself, as there are a large number of follow-up studies that  
297 will be able to explore different features of this dataset and use it to uncover the influences  
298 of demographic, social, and public health change on the dynamics of infectious disease. It  
299 is therefore an important contribution, worth publication in a journal with the exposure of  
300 PLoS Biology.

301 Thank you for these kind remarks.

302 As a Short Report, I realize that the analyses do not necessarily need to be complete. And  
303 yet, I was left wanting more from even these preliminary analyses. In particular, the article  
304 goes into extensive detail about the history of smallpox in London, but the connection  
305 between the statistical analyses and this story is only explored in a very limited fashion. In  
306 particular, while Fig. 2 and Fig. 4 both annotate the data with major historical events that  
307 might be relevant to smallpox transmission and mortality, the discussion of the connection  
308 between any patterns observed in the data and these events in the Results or Discussion

309 is very limited. For example, on lines 454-462, the authors note several timepoints where  
310 seasonality shifts, but those timepoints are not explicitly related back to any of the key  
311 events in the history of smallpox. Or, for another example, on lines 422-428, there is more  
312 connection between the regularity of epidemics and the history of variolation and vaccination,  
313 but there is no discussion of whether the patterns observed in the data (e.g. the shift to very  
314 regular epidemics with the introduction of variolation) make sense given the likely effects  
315 of control measures on transmission. This carries over into the Discussion as well, which  
316 was too brief given all of the potential for a very interesting discussion of a very interesting  
317 dataset.

318 We have substantially expanded and improved our exposition in the “Results” and “Discus-  
319 sion” sections, including much more commentary.

320 I do think there is plenty of space available to expound on the connection between the statis-  
321 tical analyses and the historical transitions in both London’s demography and the control of  
322 smallpox, as the historical sections can probably be shortened or eliminated without much  
323 loss. In particular, the entire section on “Types of Smallpox” (including Fig. 1) could be  
324 removed without loss of content, as none of the information in that section has any bearing  
325 on the analysis presented in the paper. Much of that information (e.g., on incubation periods  
326 and infectiousness) would be relevant to an paper attempting to fit an epidemiological model  
327 to the data, which I assume will happen in a follow-up paper. Similarly, the section, “Small-  
328 pox history” could also be drastically shortened: it is included only “to provide context”  
329 (line 27), but it is unclear to me how that context is actually helpful, given the detailed  
330 discussion of smallpox history in London that follows, especially in the “Annotation of data  
331 with historical events” section.

332 We have followed all these sensible suggestions (including removing the figure and section  
333 on types and natural history of smallpox). Indeed, we do plan a followup paper using a  
334 mechanistic epidemiological model.

335 In sum, I think this is a very interesting dataset and analysis, and that some effort to tighten  
336 the connection between that analysis and the historical events discussed in the paper would  
337 make it a very valuable contribution.

#### 338 **Reviewer #4:**

339 This is a unique and fascinating study on the long-term population dynamics of smallpox.  
340 The assembling and curating of such a long record with concurrent relevant events on the  
341 history of control is of major value to the field of population dynamics of infectious diseases  
342 in general.

343 Thank you for these kind remarks.

344 I have however a number of comments intended to clarify the analyses and to strengthen the  
345 conclusions. I believe the authors should be able to address these, and to go further in the

346 interpretation of the results and the kinds of questions this data set, unique in its length,  
347 will allow them or others to address in the future, given the results here and what is already  
348 known about seasonal SIR dynamics. On this last aspect, I have found the paper a bit thin.

349 1) The changes in seasonality are an important result. A main conclusion is a shift from  
350 summer to winter (line 490 Discussion). The analysis presented in Fig 4b is difficult to ‘see’.  
351 That is, one can read the caption and text but it is difficult to actually see the described  
352 patterns in the figure itself. This is because with so many years compressed in the x axis,  
353 one cannot easily follow where the main season is for a given year and how the trends go.  
354 I would recommend additional plots to make this sufficiently clear. For example, boxplots  
355 representative of the seasonal patterns in selected windows of time would help despite the  
356 non-stationarity of the ‘average’ seasonal cycle.

357 We experimented with a number of representations of seasonality and converged on what we  
358 hope the reviewer will find to be a compelling figure (Fig 4D).

359 (A smaller comment: the sentence on the zeros not being represented in the caption was  
360 confusing. The effect of the detrending needs to be clarified).

361 Please see the “Seasonality” subsection of the “Methods” section. We hope our explanation  
362 of this issue is now clear.

363 Another important conclusion on the seasonality is in Line 471, where the authors write  
364 about changes in the strength of the annual power. I could not see where this comes from.  
365 The Fourier power spectrum averages over time, and as far as I could tell, the wavelet  
366 spectrum, which doesn’t, was applied after filtering the annual variation, so one cannot see  
367 there the non-stationarity of the annual power.

368 Annual variation was not filtered out before constructing the wavelet spectrum. There is, in  
369 fact, clear annual power from the beginning of the time series until the early 1800s, as we  
370 now mention in the “Seasonality” subsection of the “Discussion” section.

371 2) Another major result concerns the changes over time of the interannual variability; that is,  
372 the changes in the dominant periods of multi-annual cycles. These changes are interpreted  
373 as the consequence of control rather than birth rates (and contrasted to the importance  
374 assigned to demography in studies of other seasonal infectious diseases). This is where I  
375 would have liked to see a clearer exposition of why demography is not an important driver of  
376 the changes. From previous influential work on measles and childhood infections (including  
377 contributions of one of the authors, David Earn), we know that birth rates, transmission  
378 rates, and vaccination coverage, can have equivalent/related effects on seasonal SIR dynam-  
379 ics. How do the patterns/trends here relate to that previous knowledge and how can one  
380 infer the importance or dominance of control over demography?

381 We did not mean to imply that secular changes in birth rates are not important. We have  
382 tried to be clearer about this, and emphasize that many factors could have contributed to  
383 changing transmission rates as well. Our purpose in this paper is to describe the patterns and  
384 set the stage for future analyses based on mechanistic mathematical models, as we indicate

385 at the end of the “Discussion” section.

386 3) Are there ways to look at the changes in the intensity of the annual cycle in relation to  
387 the importance of other, longer, cycles? We know from earlier theory how the spectrum  
388 of seasonal SIR dynamics should change with demography and transmission intensity. Are  
389 there concurrent patterns in how the power is distributed over different periods that would  
390 relate to that theory and allow interpretation?

391 There certainly are ways to explore these things using mechanistic models, and it seems  
392 the reviewer is familiar with some of the second author’s related work on other infectious  
393 diseases. The first author did some preliminary work on this in her PhD thesis, and in the  
394 meantime DE has worked on improving methods to estimate seasonal variation of contact  
395 rates in these long time series, and refine the methodology in several other respects. We  
396 do hope to complete a paper on mechanistic analyses of the data presented here before too  
397 long.

398 4) Similarly, a major contribution of this paper will be to make this remarkable data set  
399 available to the community. The analyses in the paper itself are largely descriptive of trends  
400 in the seasonal and interannual variability and in relation to the timing of control efforts. It  
401 would be valuable to go further and based on these patterns, provide some major directions  
402 for what these data will allow going forward, in particular from their analyses with process-  
403 based models and related hypothesis about smallpox and seasonal SIR dynamics in general.

404 We appreciate this suggestion and have now included a subsection “Explaining transitions  
405 in smallpox dynamics” in our “Discussion” section. We have tried to articulate some of the  
406 challenges that must be overcome when following the exciting path that the referee seems  
407 to have in mind.
